# Supplementary material
Source: PubMed Central journal article supplement (PMC6754518)
Supplement: 12264_2019_376_MOESM1_ESM.pdf [file 12264_2019_376_MOESM1_ESM.pdf]

## Supplementary Materials

A

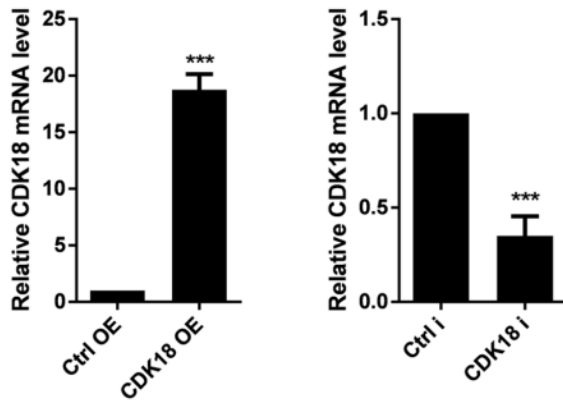

**Fig. S1 The overexpression or interference efficiency of CDK18 OE and CDK18i viruses.**

A Quantitative PCR assay of mRNA level of *CDK18* in purified OPCs transduced with CDK18 OE viruses or CDK18i viruses and control virus. Results are expressed as mean  $\pm$  SEM. Student's *t*-test: \* $P < 0.05$ , \*\*  $P < 0.01$ , \*\*\* $P < 0.001$ .  $n=4$  independent experiments.

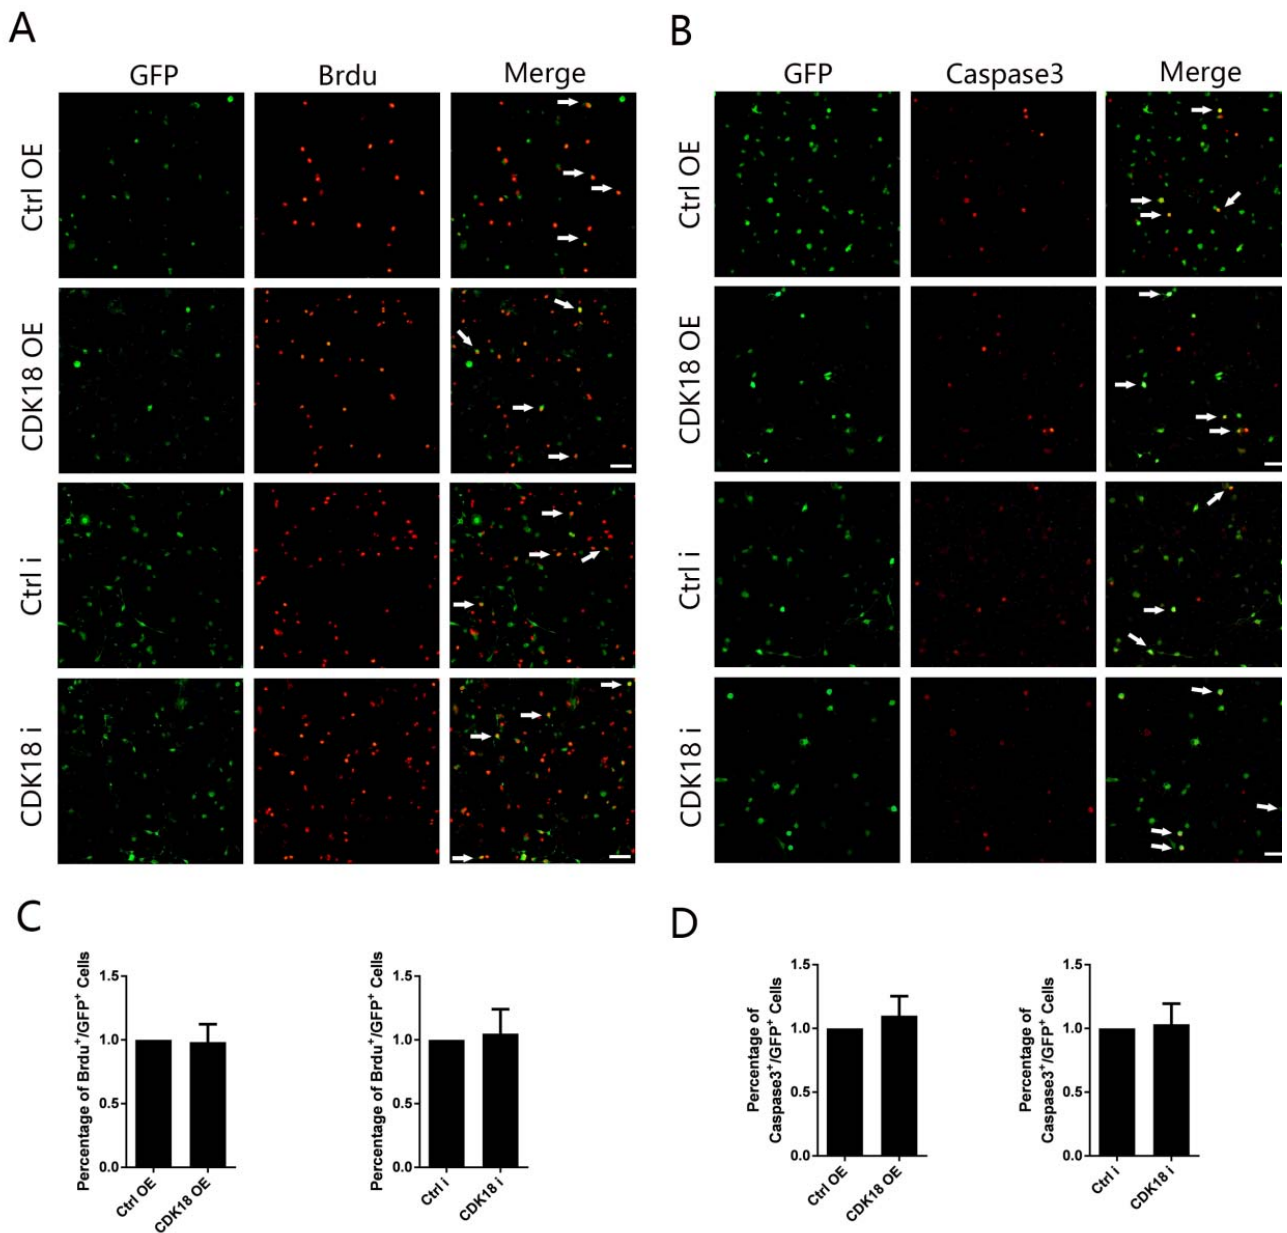

**Fig. S2 CDK18 does not affect OPCs proliferation and survival.**

**A** Representative images showing BrdU immunocytofluorescence staining (red) of CDK18 OE and CDK18i virus transduced OPCs (Green). **B** Representative images showing Caspase3 immunocytofluorescence staining (red) in CDK18 OE and CDK18i virus transduced OPCs (Green). **C** Quantitative analysis of the percentage of BrdU<sup>+</sup>GFP<sup>+</sup> cells in all GFP<sup>+</sup> cells in indicated conditions in A, Data are normalized to control. **D** Quantitative analysis of the percentage of Caspase3<sup>+</sup>GFP<sup>+</sup> cells in all GFP<sup>+</sup> cells in indicated conditions in B, Data are normalized to control. Results are expressed as mean ± SEM. Student's *t*-test. Scale bar, 20 μm. *n*=3 independent experiments.

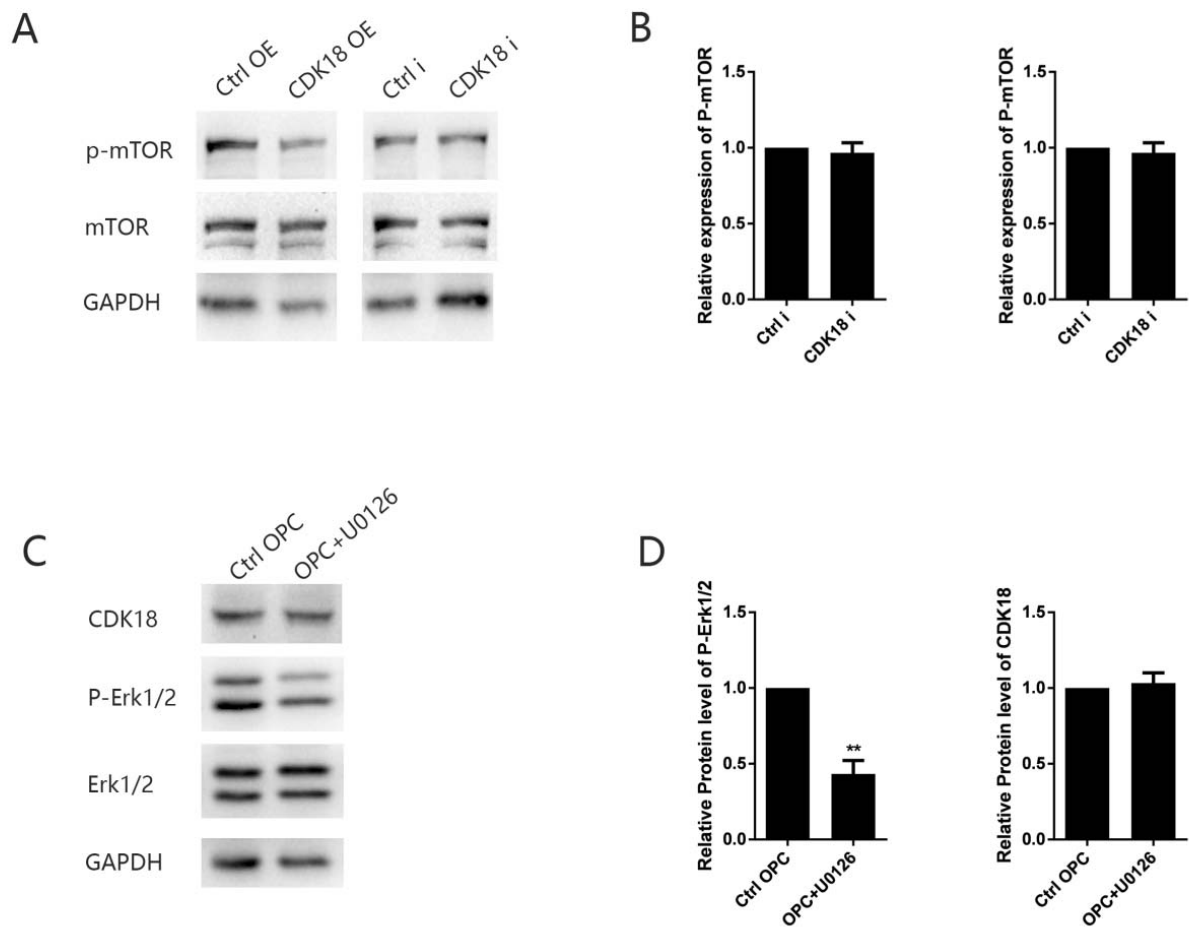

**Fig. S3 The effects of CDK18 OE and CDK18i virus on P-mTOR expression, and the effects of Erk1/2 inhibitor on CDK18 expression.**

**A, B** Representative western blotting figure(**A**) and statistical analysis(**B**) of the expression of P-mTOR and mTOR in purified OPCs transduced with CDK18 OE or CDK18i virus and control viruses.

**C, D** Representative western blotting figure(**C**) and statistical analysis(**D**) of the effect of Erk1/2 inhibitor U0126 (10nmol/L) on the expression of P-Erk1/2, Erk1/2 and CDK18 protein level in purified OPCs cultured in differentiation medium for 72 h. Results are expressed as mean  $\pm$  SEM. Student's *t*-test. *n*=3 independent experiments.
